# Supplementary material
Source: MDPI journal article supplement (https://www.mdpi.com/2673-4931/6/1/25)
Supplement: s1 [file s1]

# Nano-Phytoremediation of Heavy Metal Contaminated Wastewater Ecosystems and Wetlands by Constructed-Wetlands planted with Water-logging-tolerant Mycorrhizal Fungi and Vetiver Grass

A G Khan

Grad Life Member Western Sydney University

Alumni Sydney University

[Researchgate..net/profile/abdul\\_khan206.](https://www.researchgate.net/profile/abdul_khan206)

[Linkedin.com/in/abdul-khan-0603115a/](https://www.linkedin.com/in/abdul-khan-0603115a/)

E'Mail: [lasara1937@gmail.com](mailto:lasara1937@gmail.com)

# Wetlands & Their Significance

- Wetlands & Aquatic Ecosystems:
  - important part of ecological systems
  - National Resources

## Becoming polluted

- By toxic heavy metals from man-initiated industrial, mining & smelting of metalliferous ores , & agricultural activities
- Need to well manage
- Loss of wetlands & aquatic ecosystems may end with lost Flora & Fauna
- Influence BIODIVERSITY

Need to be well managed and protected

# Potential sources of heavy metals (HM) in the environment

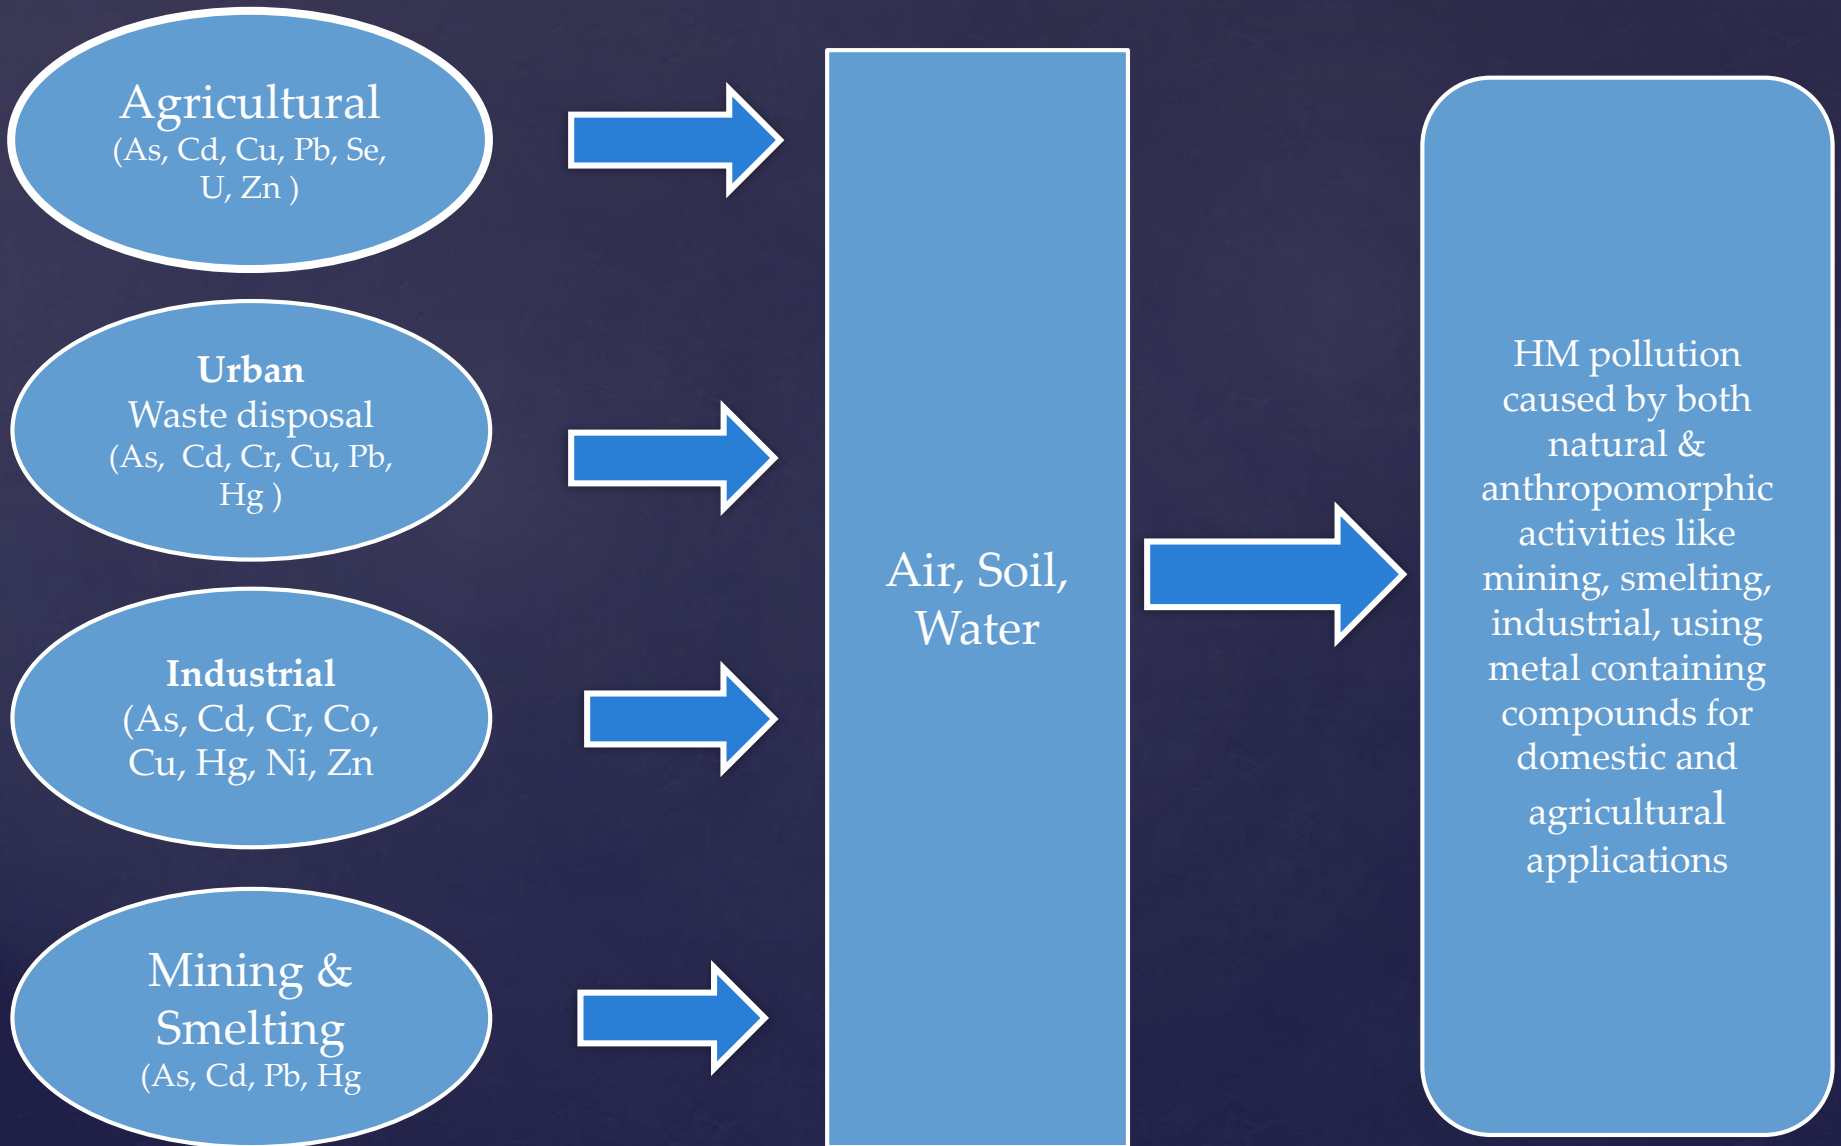

# HMs in soil, air, and water environments effects Human Health

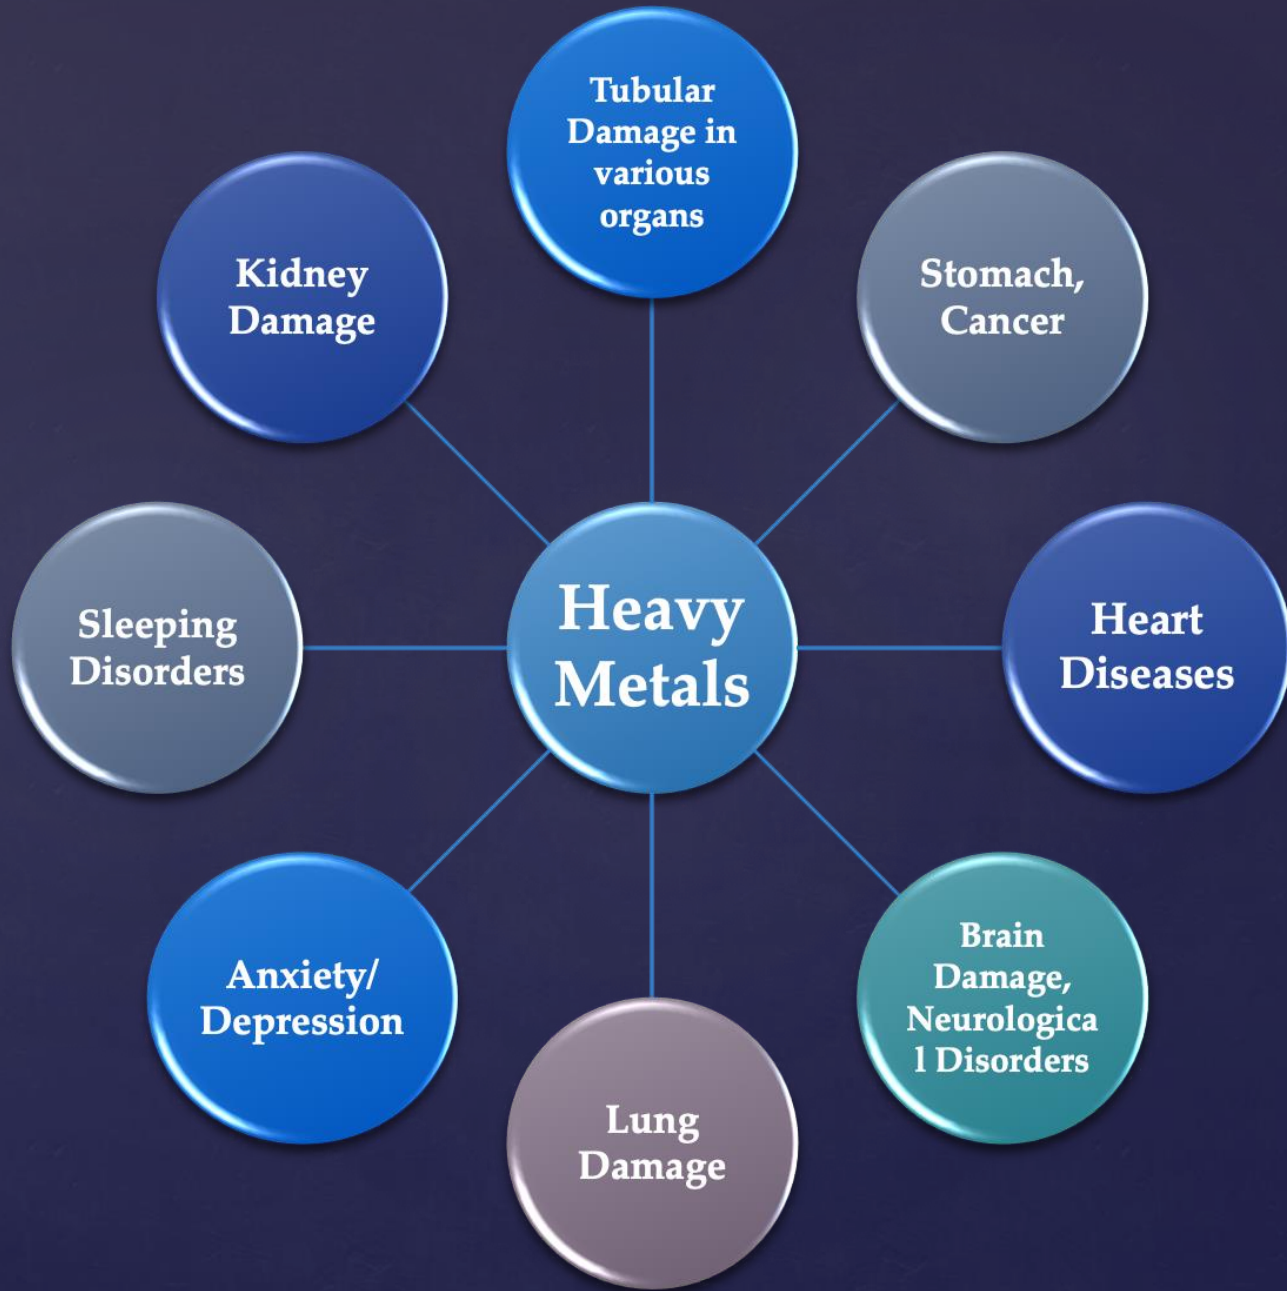

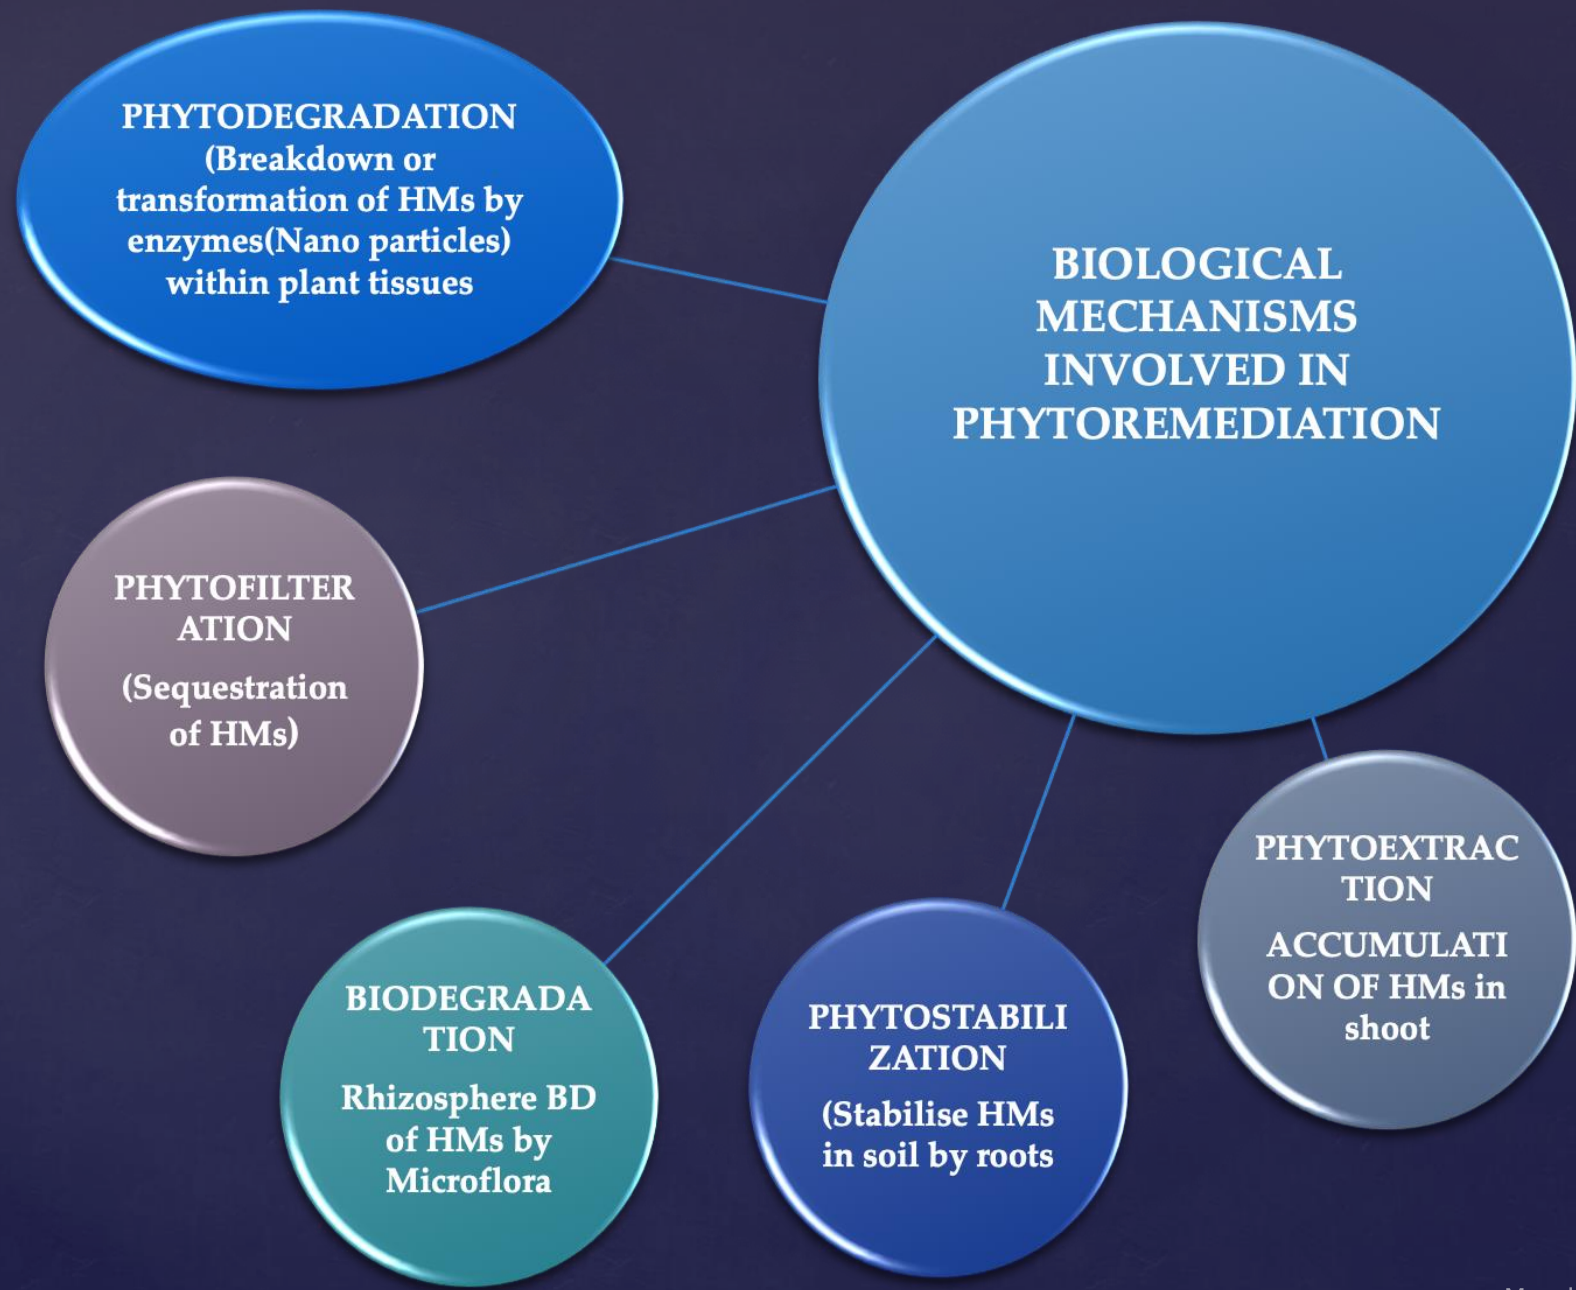

# Phytoremediation Techniques for Decontaminating HM-Pollute Aquatic Ecosystems and Wetlands

- 1. Phytostabilization (stabilize HMs in the rhizospheres of aquatic macrophytes)
- Phytofiltration (Sequestration of HMs in the roots of aquatic macrophytes)
- Phytoextraction (accumulating HMs into shoots)

# Aquatic Macrophytes Suitable for Phytoremediation of HM-polluted Aquatic Ecosystems & Wetlands –

- Be able to grow as a hydrophyte
- Have quick, rapid, and fast growth rate;
- Non-invasive
- Be vegetatively propagated and sterile;
- Yield high biomass;
- Tolerant to multiple heavy metals (HM) toxicity;
- Great accumulator of different HM;
- Large, deep and penetrating root system

ALL THE ABOVE CHARACTERISTICS ARE POSSESSED BY Vetiver Grass

7

*Vitiveria (Chrysopogon) zizinioides (Figure 1)*

March, 2021

**Shoot:**

Densely tufted,  
awnless, stiff,  
erect leaves  
glabrous, Non-  
invasive, Sterile

**Roots:**

Large and deep  
penetrating root  
system, can  
grow up to about  
4 metres.

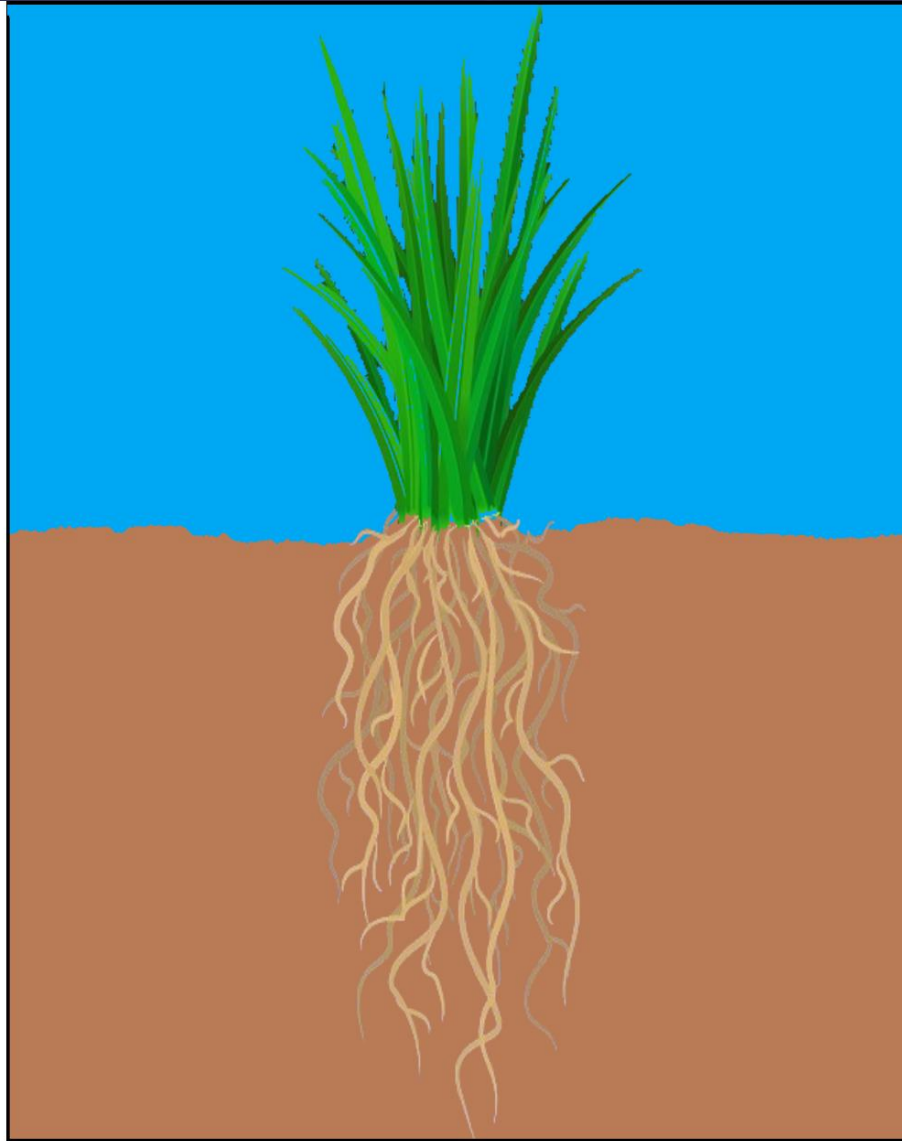

**Root:**

- Large and Deep
- No Rhizome or Stolon.
- Propagated by Slips.



# ARBUSCULAR MYCORRHIZA

- The most common Mycorrhizae
- Are highly evolved non-pathogenic symbiotic association between roots of most vascular plants and certain specialized soil fungi (Basidiomycetes, Ascomycetes and Zygomycetes); they colonize the cortical tissues of roots during periods of active plant growth both in natural environment and in cultivation.
- Display characteristic root infections with coils (arbuscules), and in some cases vesicles, and spores of various morphological features in their rhizospheres
- Play important role in survival of plants growing on HM polluted soils, on saline, or xerophytic, or aquatic conditions.

# Benefits of Mycorrhiza

- Mycorrhiza promotes the growth of host plants and increases productivity
- Improves water relations
- Protects roots from pathogenic fungi
- Saves from heavy metal toxicity
- Protects from adverse temperatures, pH, high salinity, toxic stress etc
- Reduces soil erosion
- Increases soil biological activity Influences the development of plant community

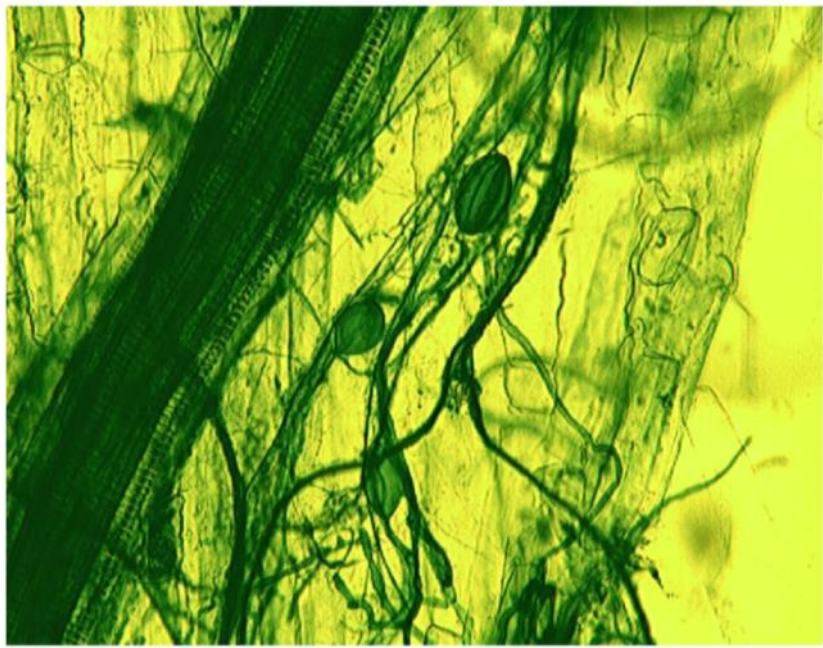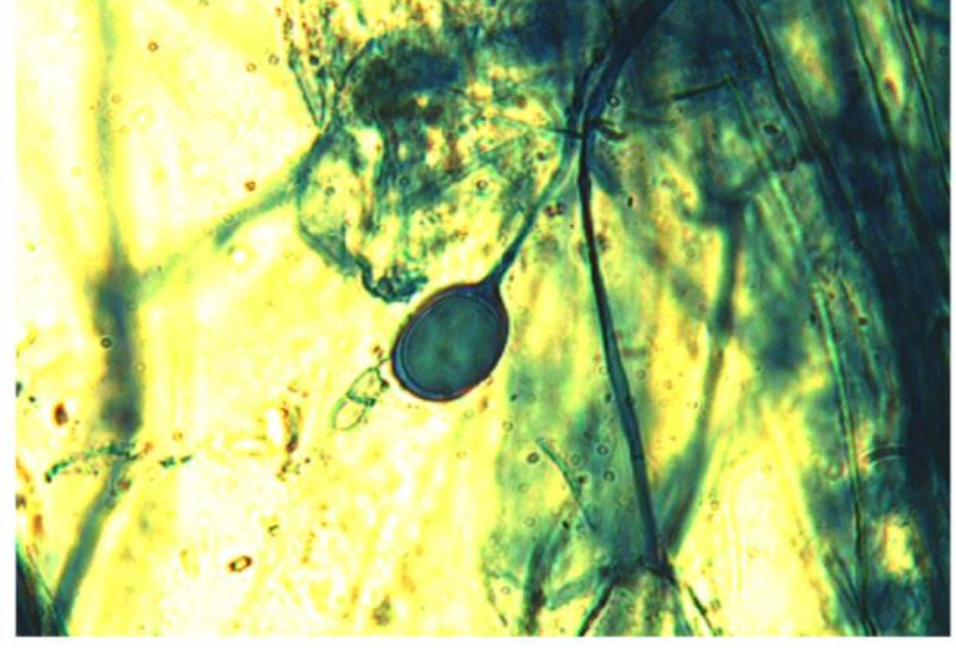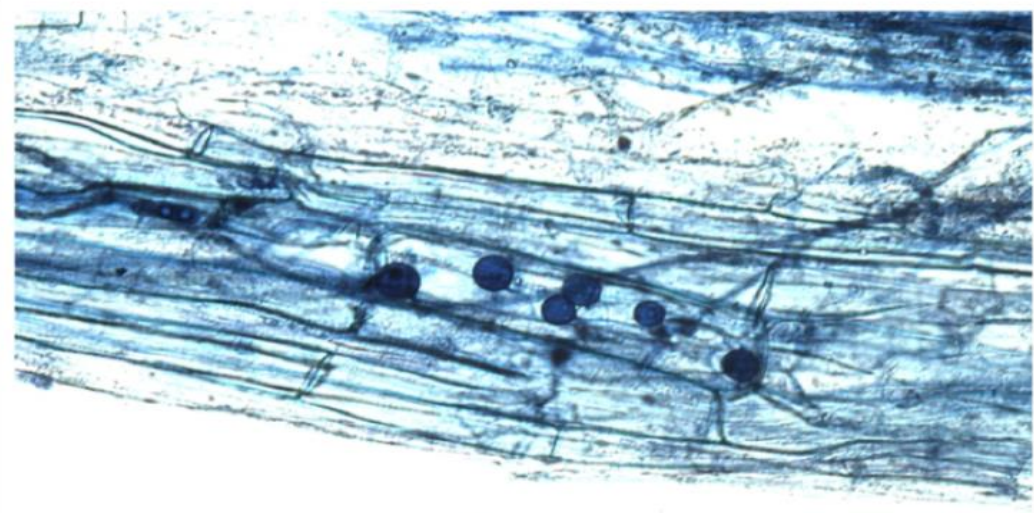

Illustrations:

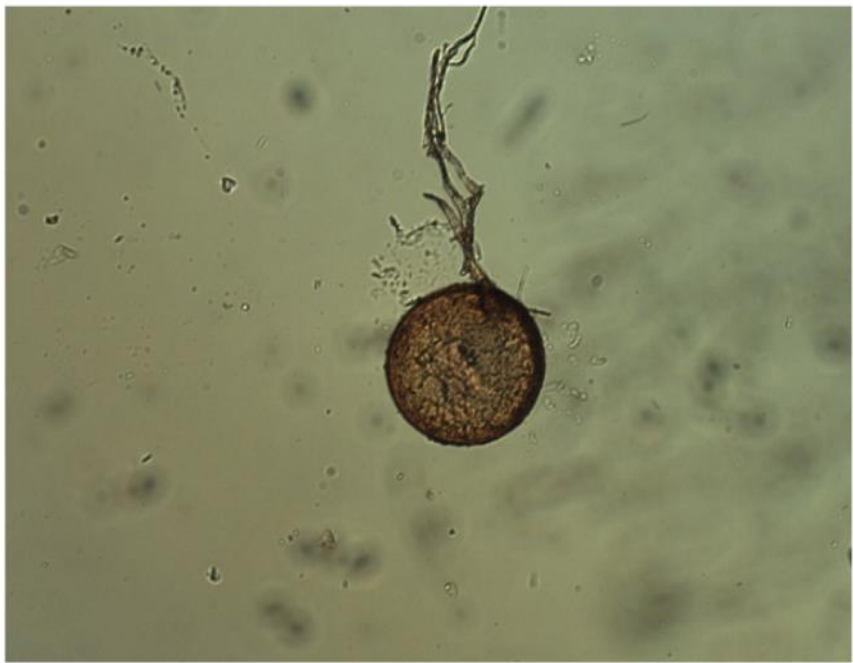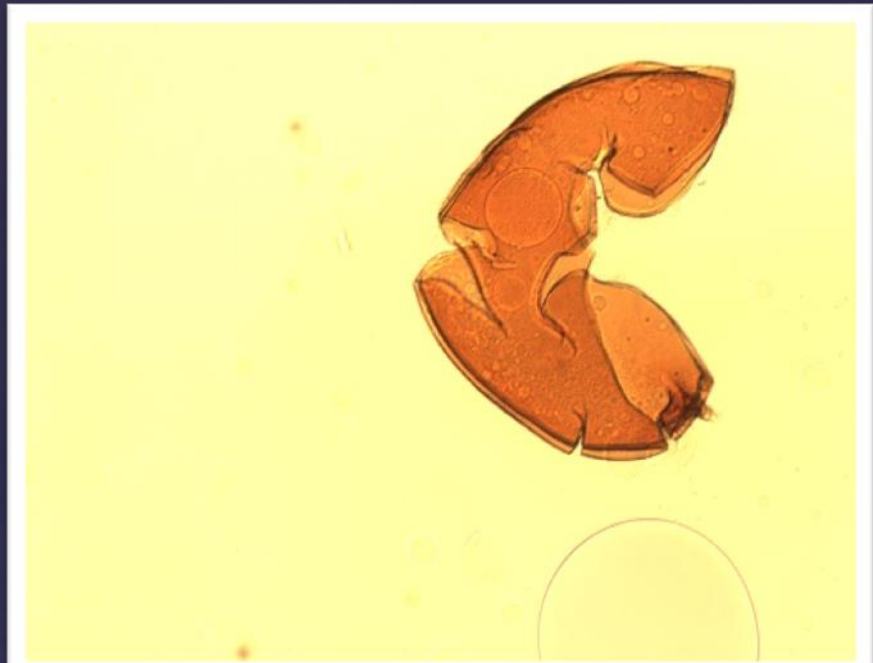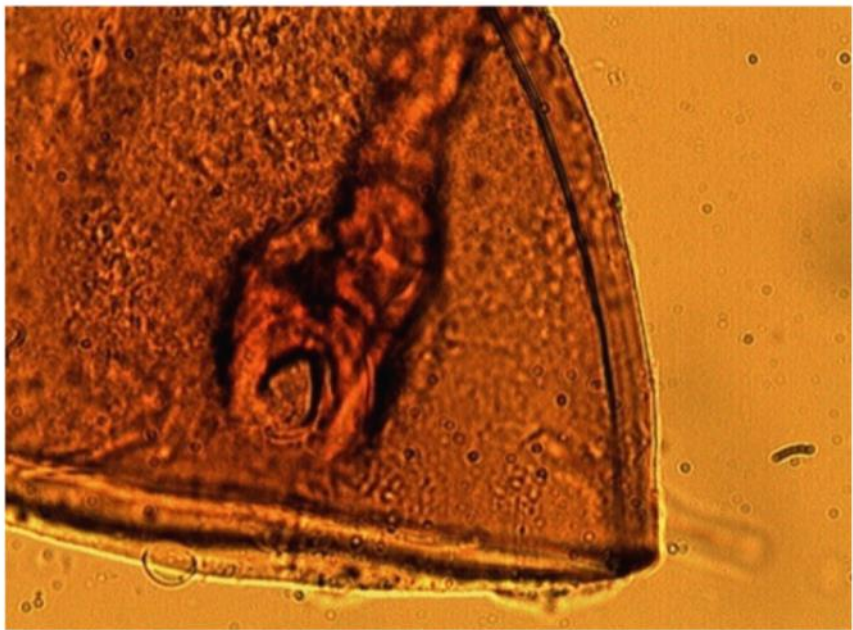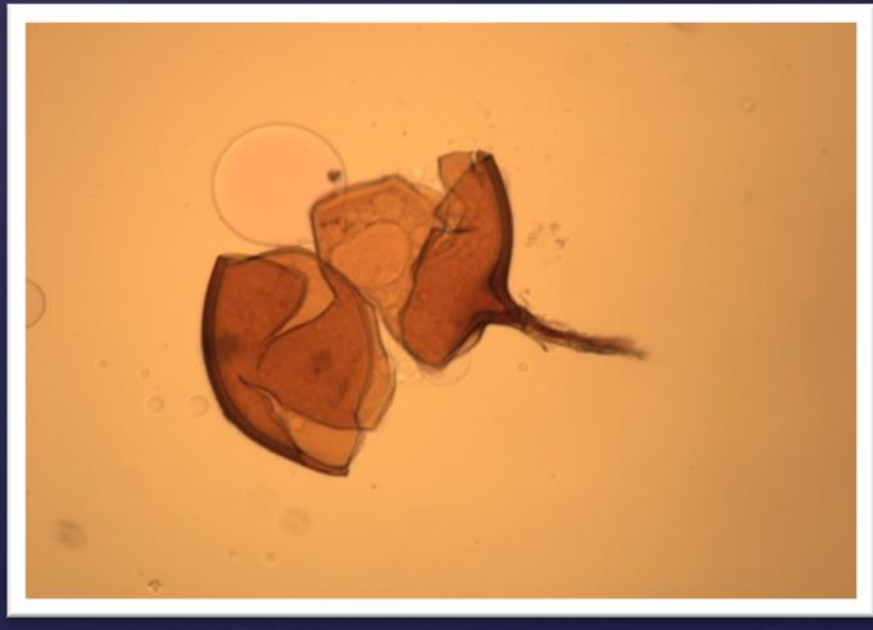

# Spores of *Glomus* spp.

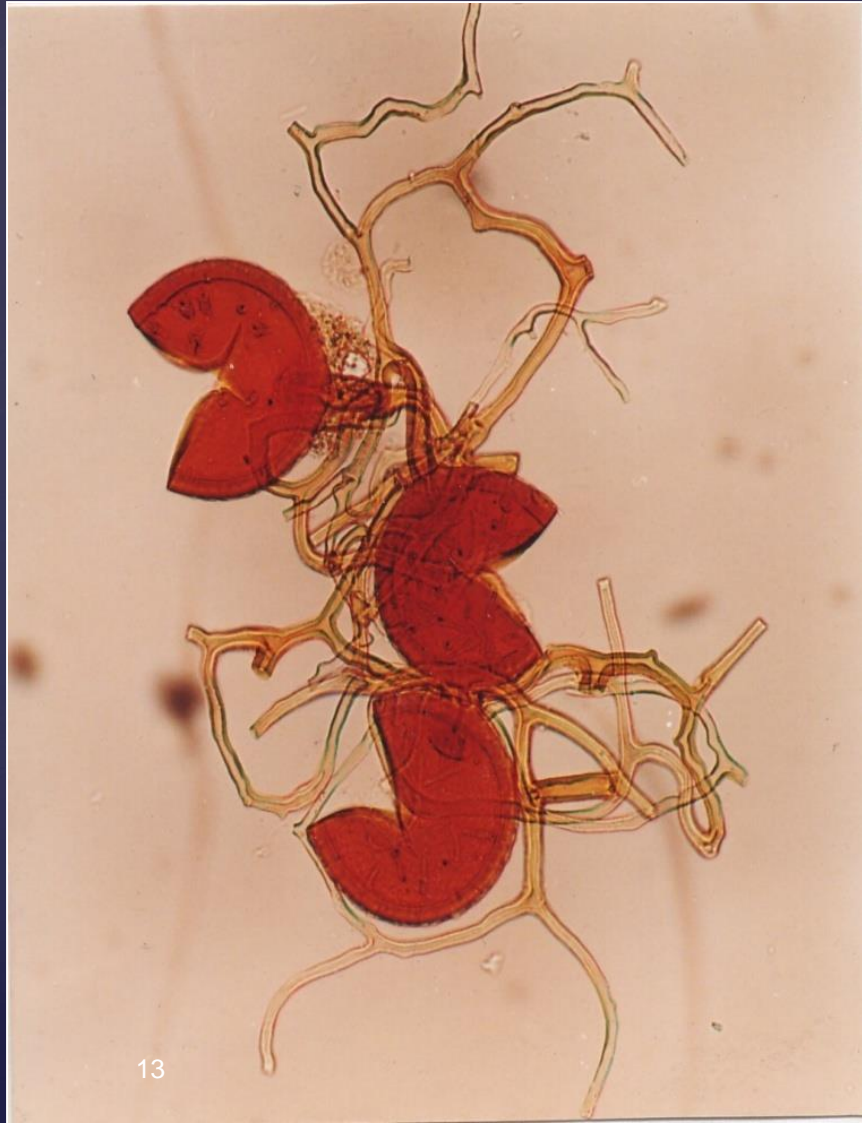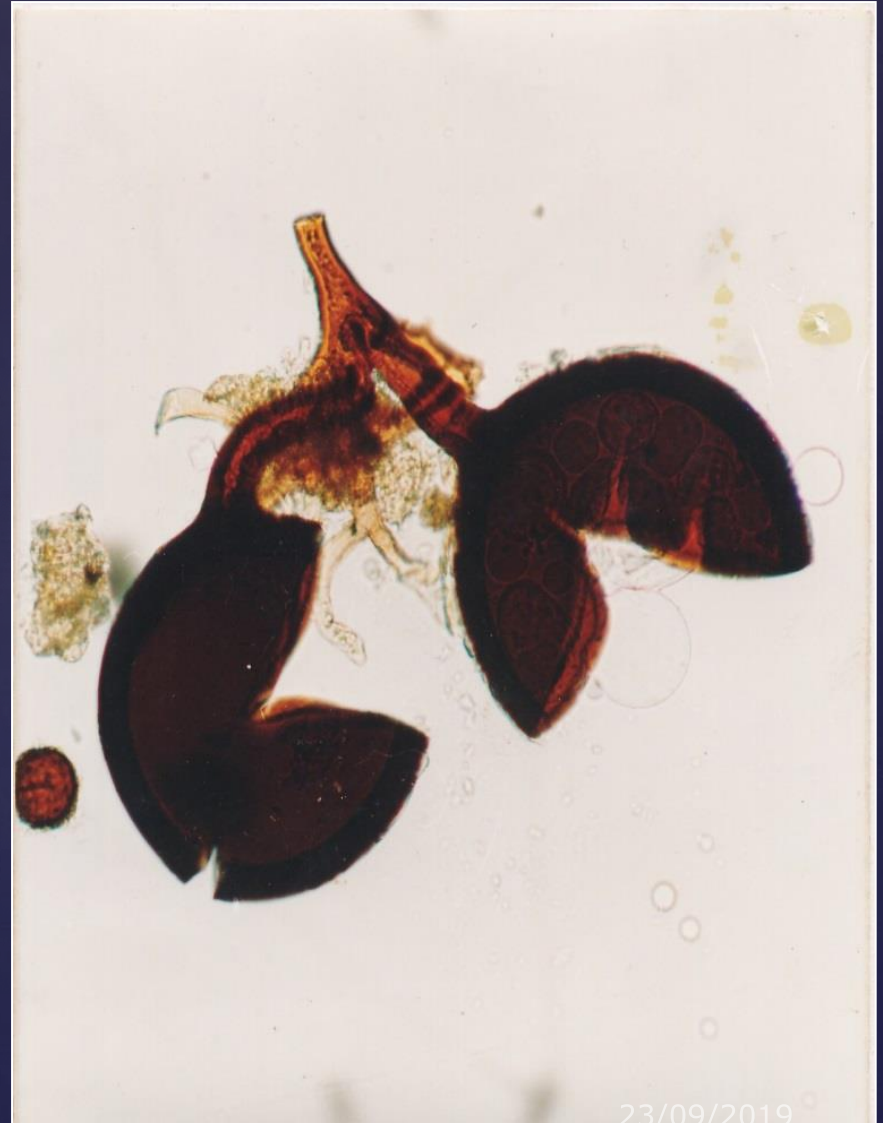

# *Sclerocystis*

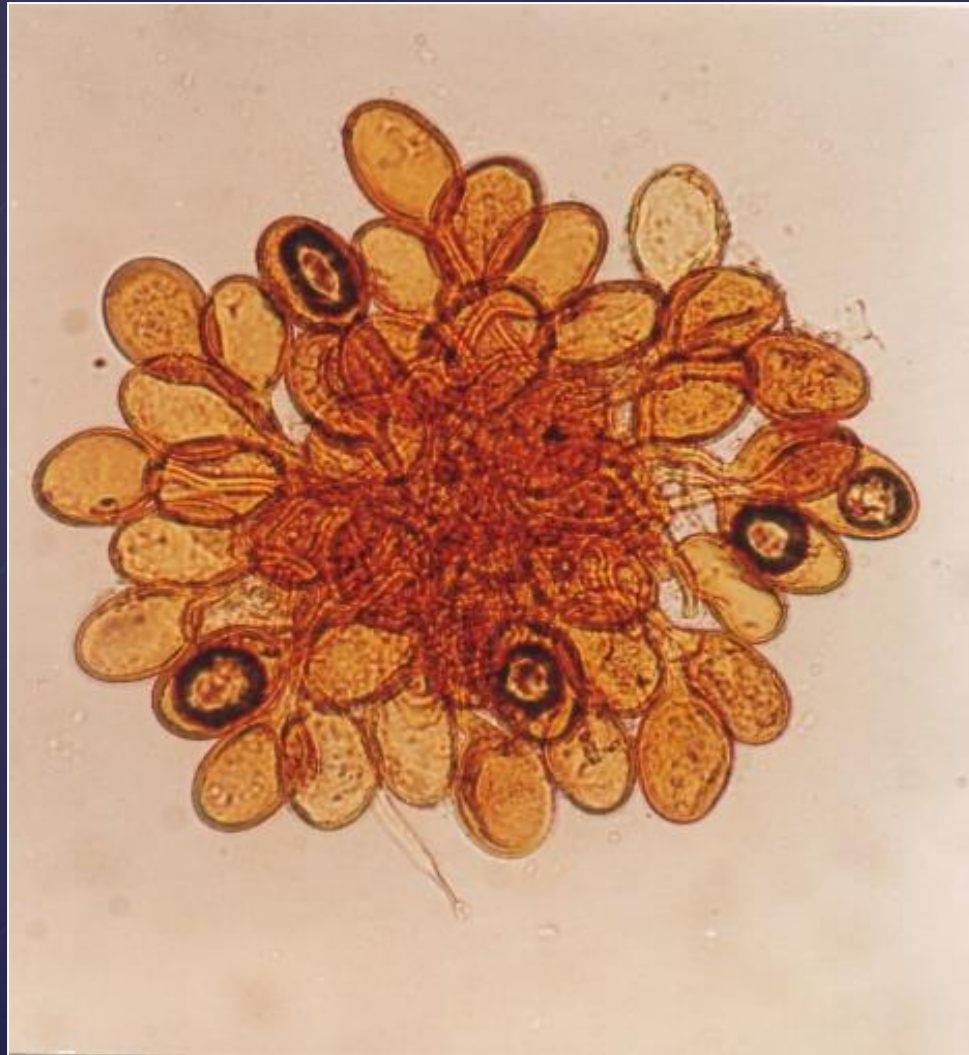

# *Entrophospora*

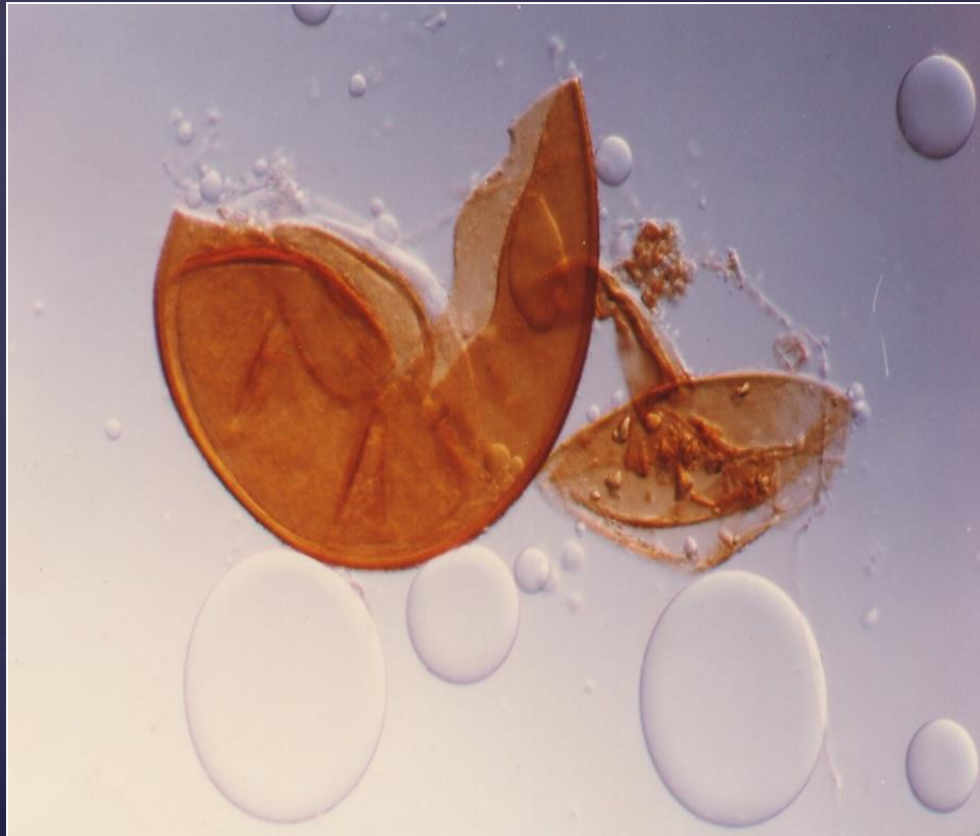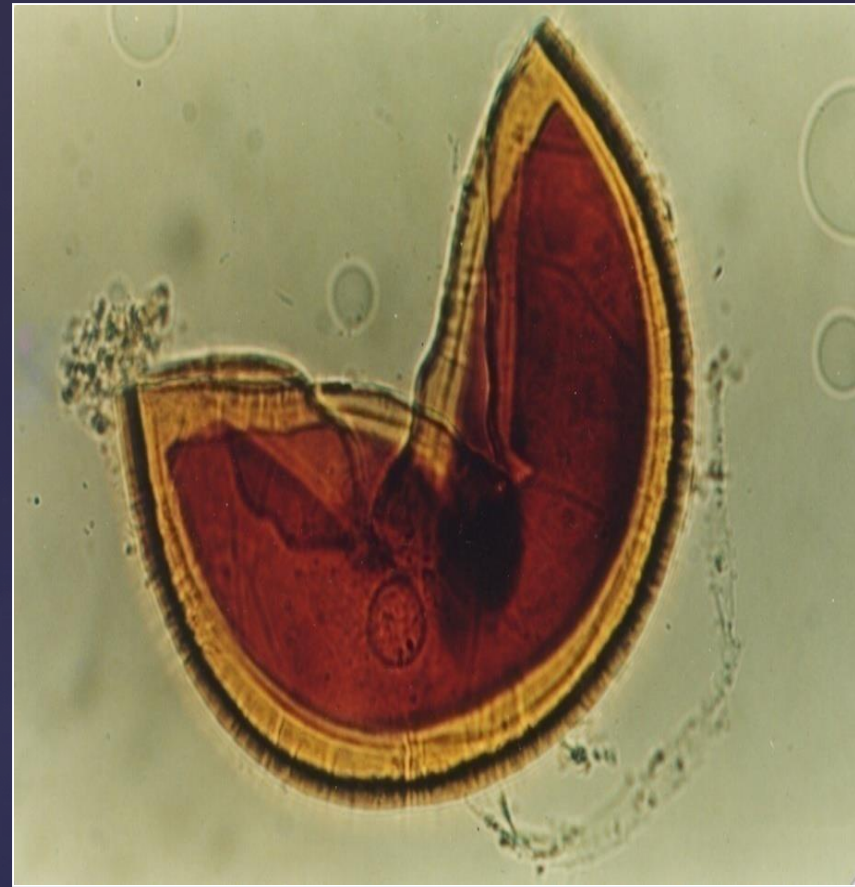

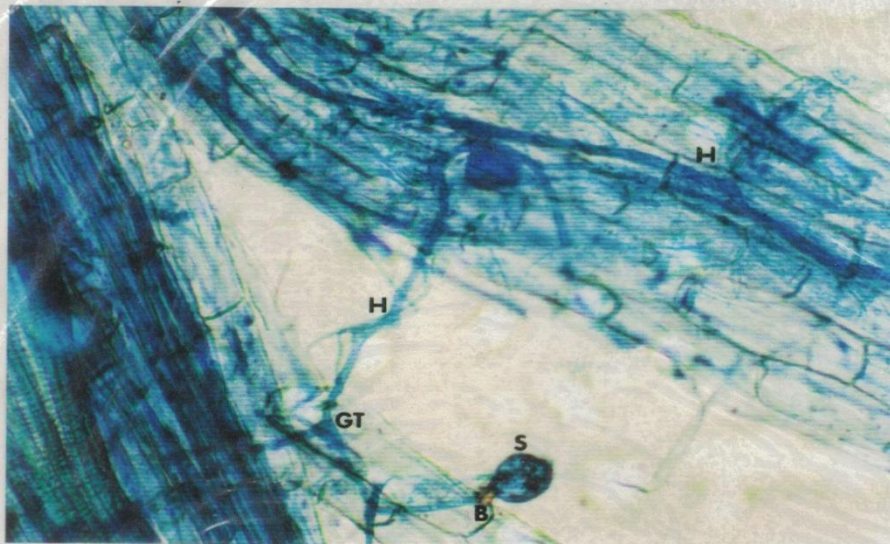

**Fig 3(a):**Microphotograph showing extension of a germ tube from an extra-matrical pregerminated spore (S) of *Gigaspora* spp. on the surface of the *Acacia dealbata* root with internal and external hyphae (H). Note the bulbous base (B) of the germinating spore (S) and two germ tubes (GT) arising from it (x100).

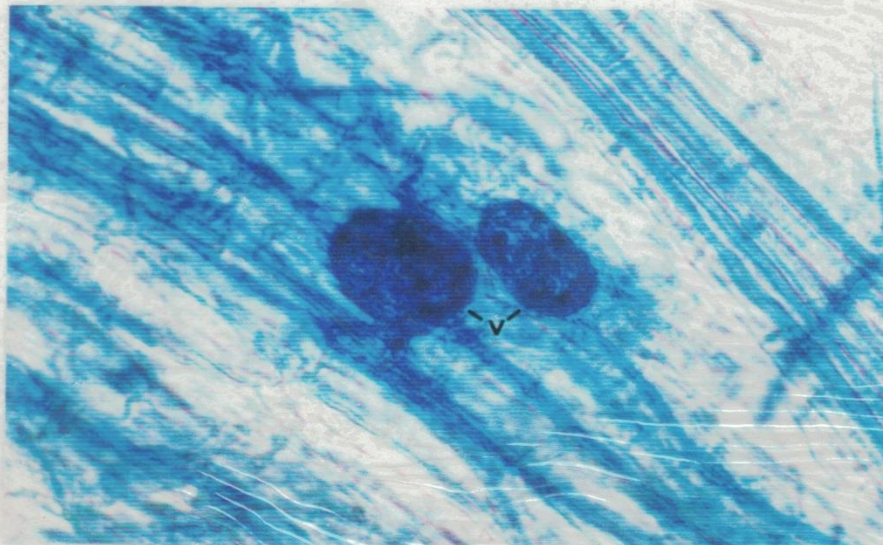

**Fig 3(b):**Terminal elliptical vesicles (V) in the inner cortical layer of *Acacia dealbata* root.(microphotograph, 100x; fungal structure stained with trypan blue)



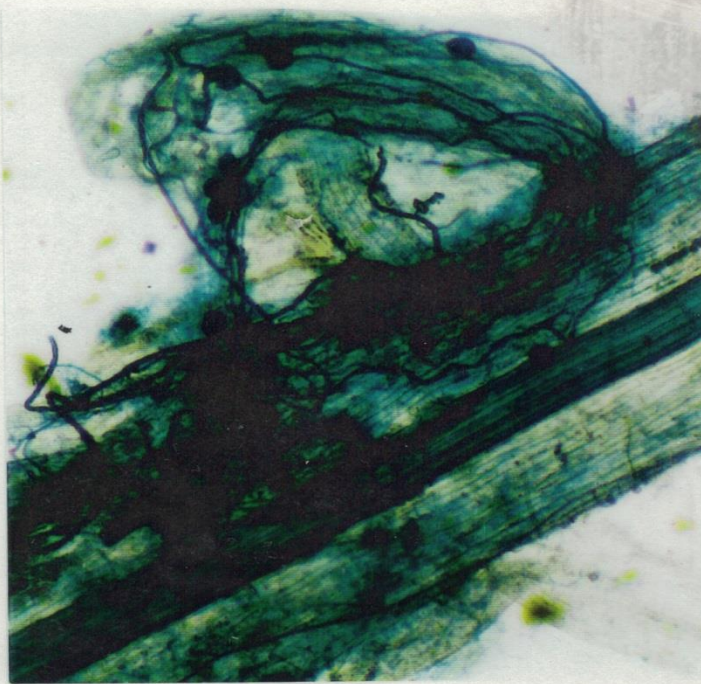

2.8b.

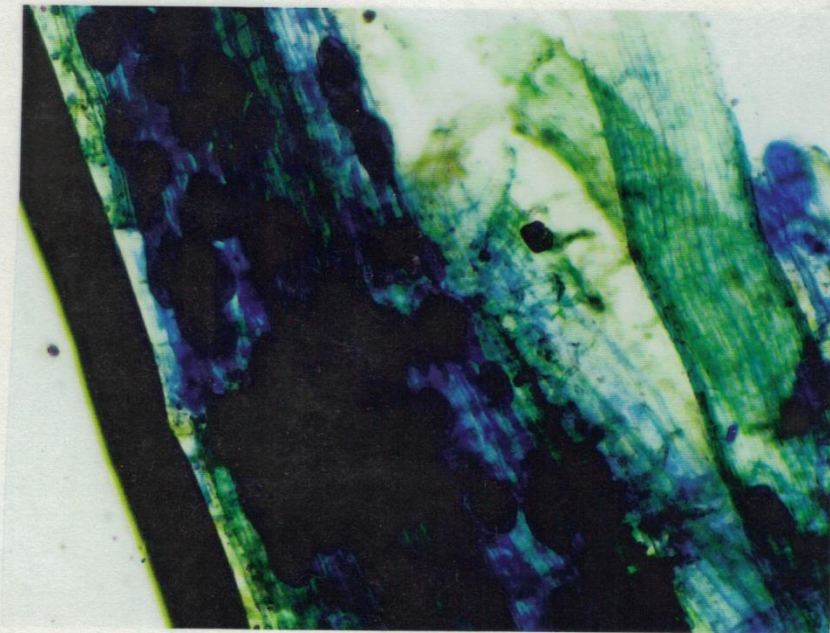

# HOW PLANTS SURVIVE IN HM-CONTAMINATED WATERS -1

## Plants either:

- Accumulate HM into their root or shoot tissues (HYPERACCUMULATORS) and survive OR tolerate saline, hydrophytic, xerophytic, and heavy metal contaminated soils
- Universal and ubiquitous AMF forming symbiotic associations with roots of these plants known to benefit plant nutrition, growth, and survival on such soils.
- Toxic metals in rhizosphere dislodge biological molecules hindering their functions & toxic to plant cells, change enzymes, proteins or membrane transport systems
- Indigenous AMF and associated rhizospheric microbes (PGPM) have mechanisms to degrade HMs

# HOW PLANTS SURVIVE IN HM CONTAMINATED WATERS- 2

Mechanism involves:

- Sequestration of HMs by root cell wall component or by intra-cellular metal-binding proteins or peptides (Nano-particles) (Metallothionins –MTs), or Phytochelatins (PCs) synthesised by plant from GSH (Glutathione) in the cytoplasm or Symplast of the plant root cells widely found in plants.
- These nano-molecules have a Potential role in detoxification of HMs by forming HM-binding complexes (nano-molecules) in the cytoplasm of root cells
- Positive relationship between levels of PCs and HM tolerance.
- Recent studies have identified specific genes for PC-Synthase for specific HMs indicating their role in HMs (Cd, As) tolerance
- Role of PC in HM accumulating plants still unclear to establish relationship – need more research re HM binding and movement in plant

# ROLE OF AMF IN PHYTOEXTRACTION & PHYTOSTABILIZATION OF HMs -1

In addition to providing nutrients to plants, AMF can:

- \* **Improve soil structure by forming soil aggregates which protect organic matter.**
- \* **Increase decomposition rates in the myco-rhizosphere**
- \* **Act as bioprotectant against phytopathogens by producing antibiotics & cell wall lysing enzymes**
- \* **Produce root exudates (organic acids) increasing solubilization & mobilization of HMs**
- \* **Convert toxic forms of HMs to less toxic to other living systems**
- \* **Play role in Absorption, Sequestration, and Transportation of HMs**

**IN DOING SO, AMF PROVIDE HYPERACCUMULATING PLANTS SPECIAL DEFENCE AND hm TOLERANCE**

March 2021

# ROLE OF AMF IN PHYTOEXTRACTION & PHYTOSTABILIZATION OF HMs -2

- High metal-affinity Transporters located in the External Fungal Hyphae make HM immobilize
- Heavy Metal tolerance by AMF due to:
  - Chelation of HMs by protein Glomalin produced by AMF
  - Followed by HMs translocation along the hyphae to root intracellular structures
  - Then, compartmentalization of HMs in the root cortical cell vacuoles
  - Then transfer to the root at the symbiotic interface (Arbuscules)
  - HMs stabilized in the root cortical cell vacuole & translocated to the AMF spores (vesicles)

NEXT FEW SLIDES SHOW INTERNAL AMF STRUCTURES IN ROOT CORTICES OF AQUATIC MACROPHYTES

ILLUSTRATION

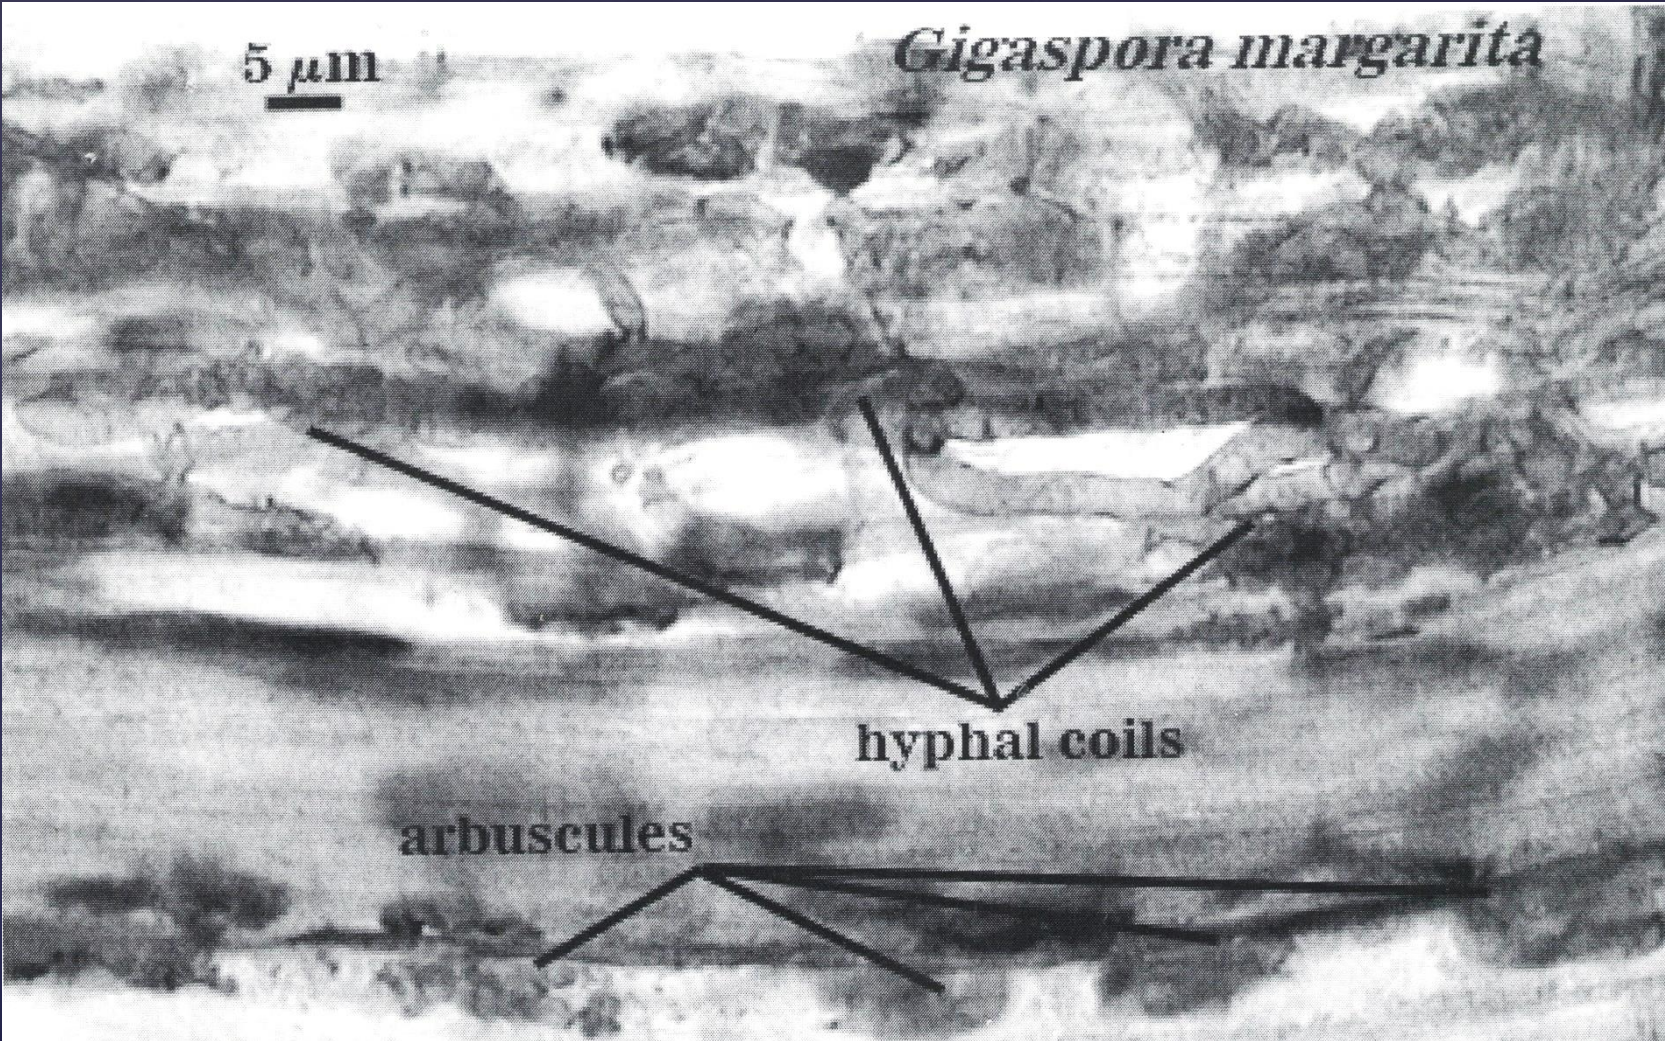

ILLUSTRATION

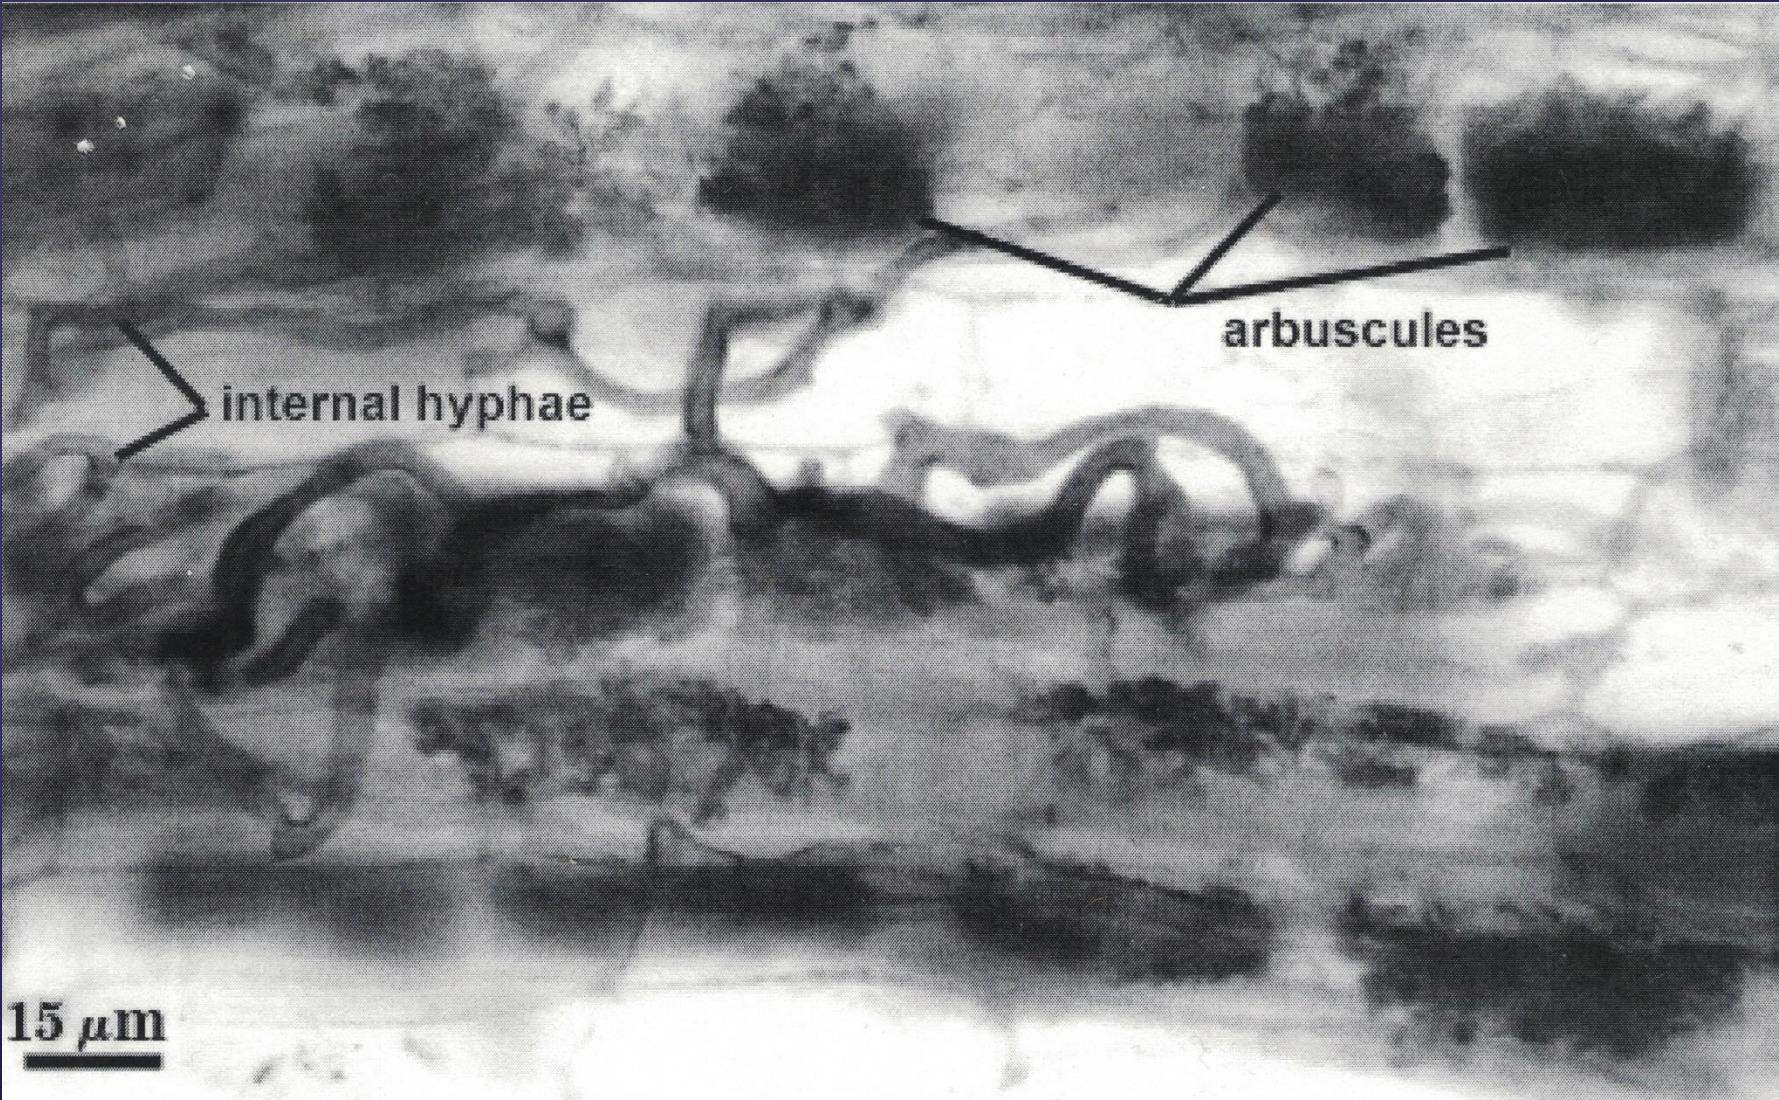

ILLUSTRATION

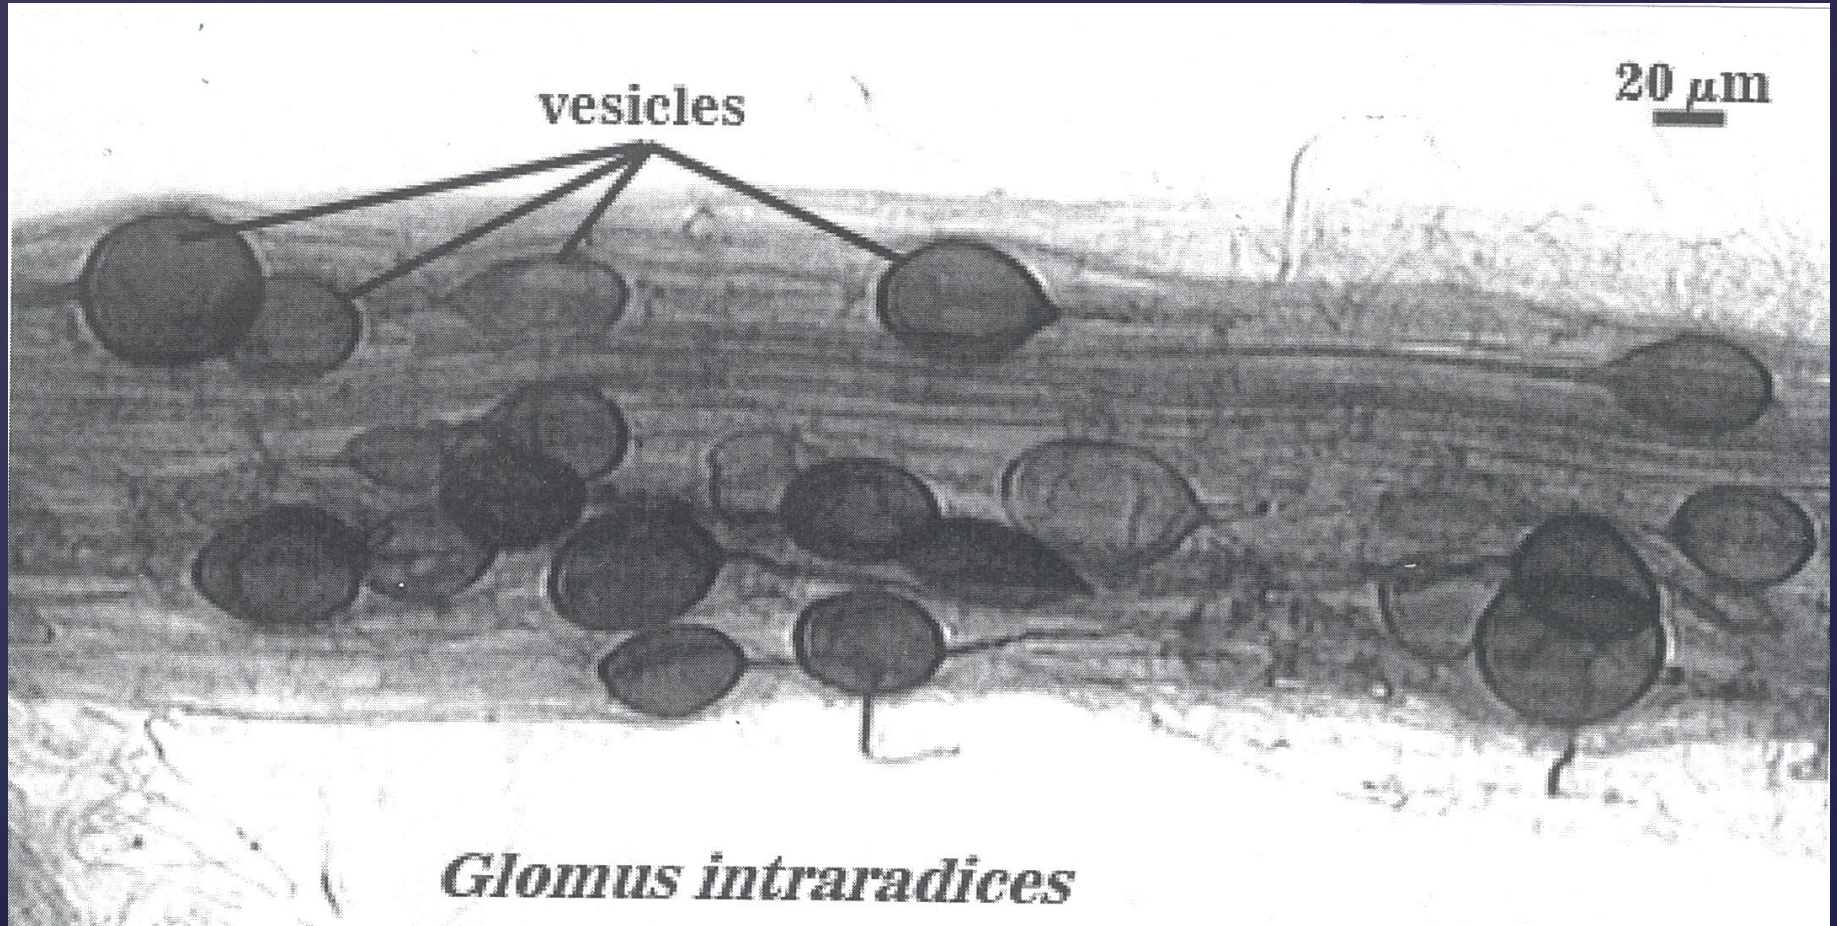



# ROLE OF AM IN HM ACQUISITION AND DISTRIBUTION

AMF PLAY IMPORTANT ROLE IN HM ACQUISITION BUT IT DEPENDS ON:

1. AMF --- introduced Non HM tolerant versus Indigenous tolerant
2. PLANT specie – HM Accumulating or HM Excluding
3. HM involved – metal speciation

During last 10 - 15 years, knowledge about mechanism of HM acquisition by AMF

- Several HM tolerance and acquisition factors (CHELATION, SEQUESTRATION & TRANSPORTATION are being identified
- Many unanswered questions still remain to be explored further

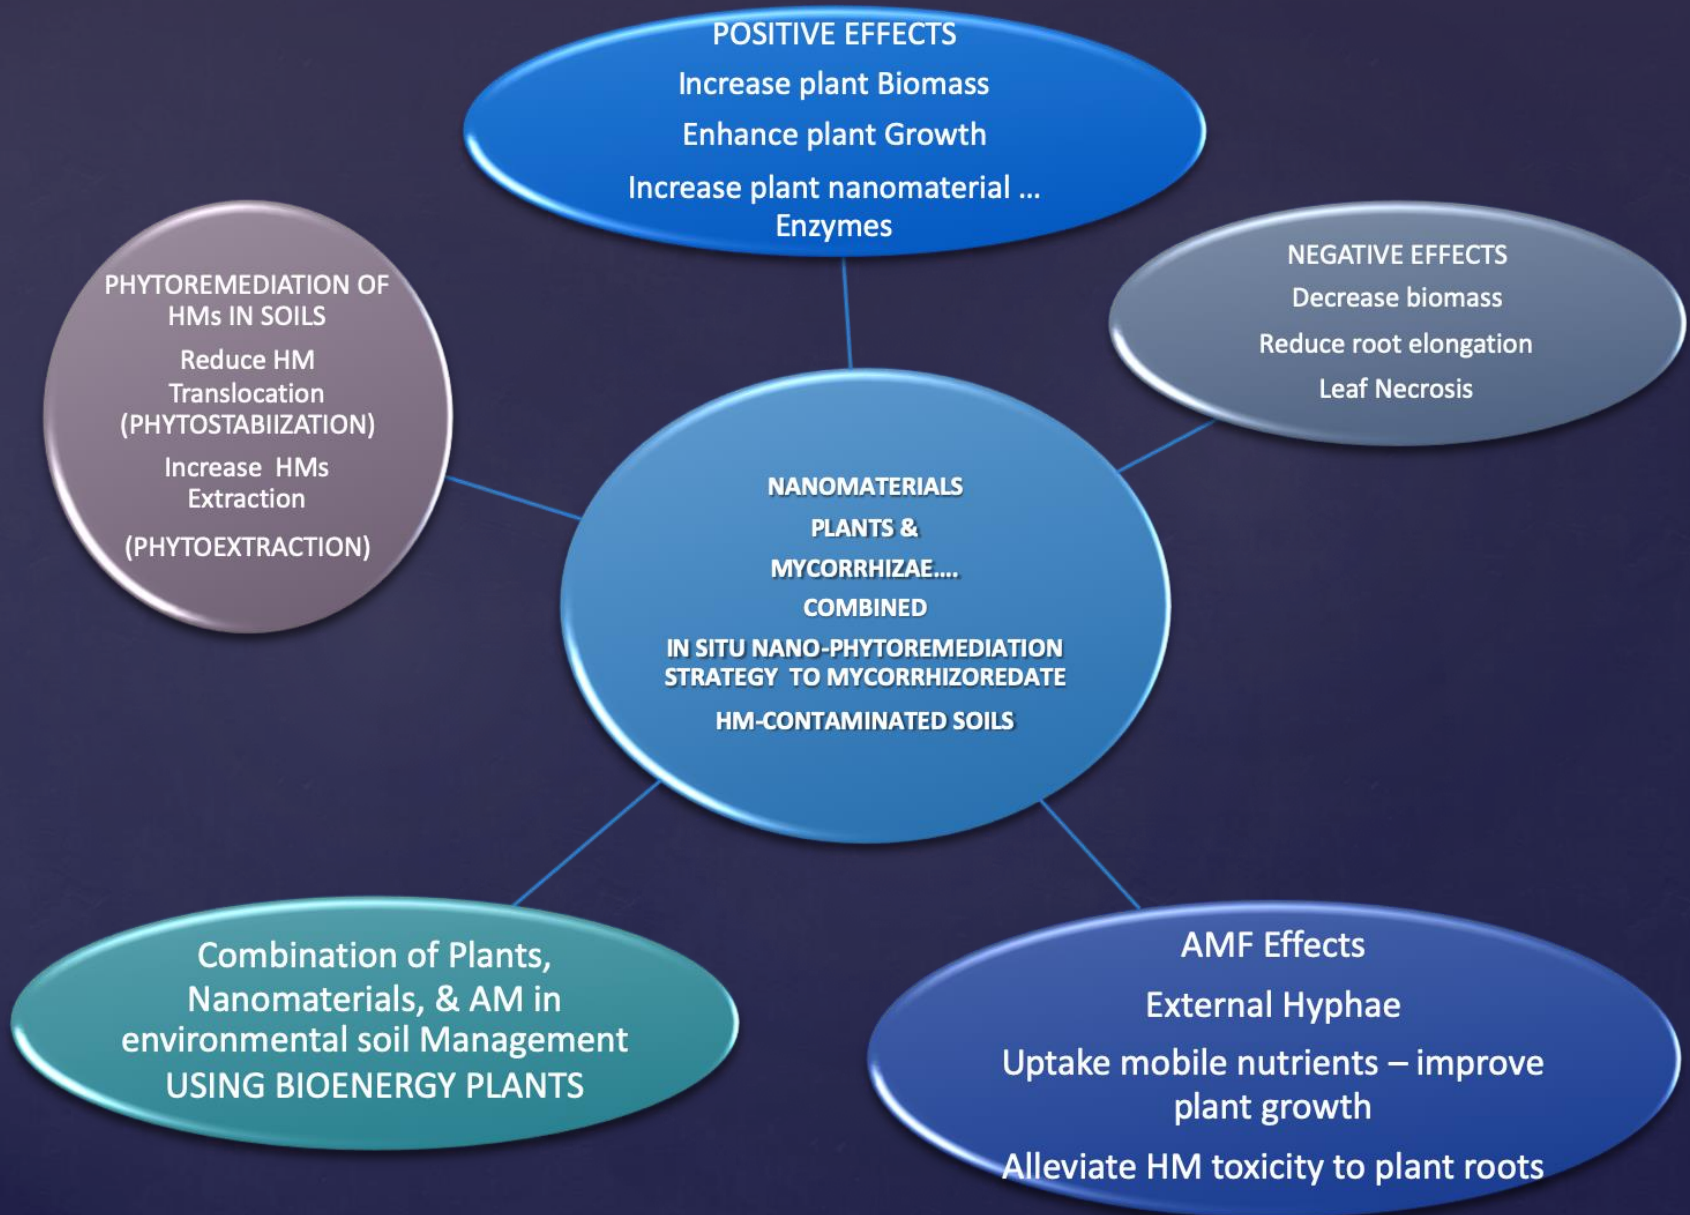

# METHODS OF AMF INOCULUM PRODUCTIONS

1. Common method – using POT CULTURE technology (Fig 1)
2. Other methods – Monoxenic Cultures utilizing split-plate cultures & RiT-DNA transformed carrot roots --- good for physiological & genetical studies

{**Mohammad A & Khan AG. 2002. Monoxenic in vitro production and colonization potential of AM fungus *Glomus intraradices* . Indian J Experimental Biology 40, 1087-1091.**}

3. Aeroponically/hydrologically produced sheared-root inoculum technique can produce commercial quantities of AMF inocula

{**Khan A.G. 2007. Producing mycorrhizal inoculum for phytoremediation. *Methods in Biotechnology* 23, 89-98.**}

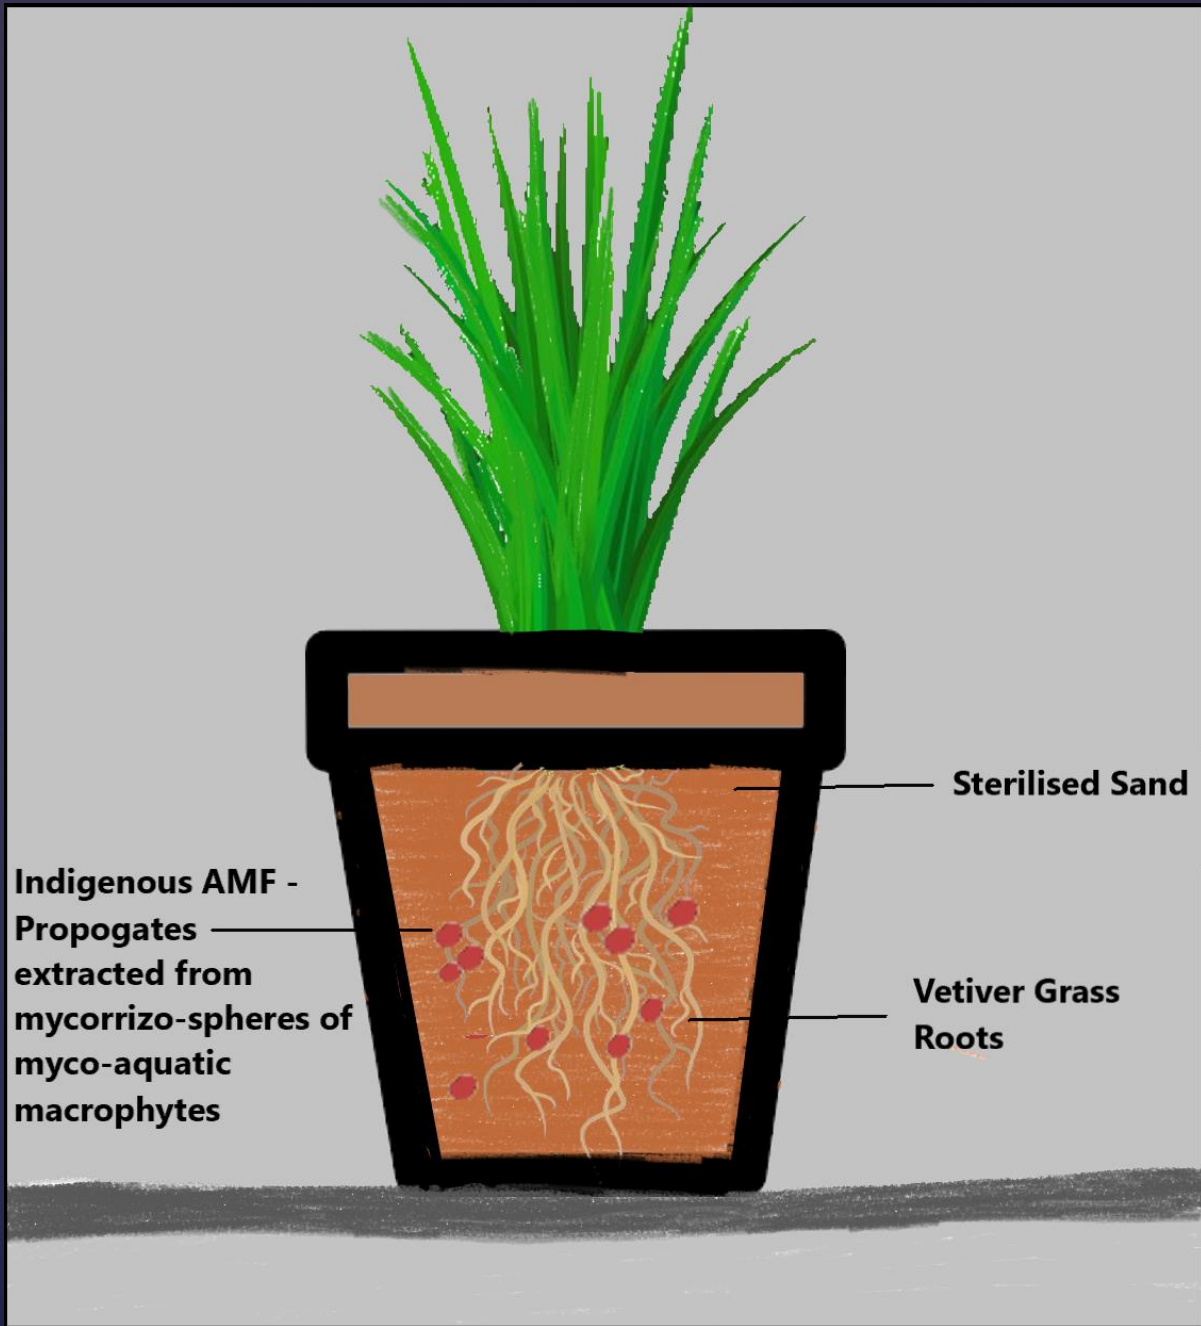

# CONSTRUCTION OF FLOATING WETLAND

Step 1: Extraction of heavy metal-adapted AMF spores from the rhizosphere of HM-adapted aquatic macrophytes growing at the land-water interface of the contaminated water ecosystem, by using Wet-Sieving and Decanting Technique

Step 2: Establishing POT-CULTURES by growing surface sterilized Vetiver grass cutting into a pot containing 1kg soil inoculated with AMF spores extracted as Step 1.

Step 3: Selecting heavily infected/AMF –preoccupied mycorrhizal Vetiver grass plants from the pot-cultures above and transferring them into floating polystyrene raft as Constructed Wetland for effective and efficient uptake of HM-contaminants from the polluted aquatic ecosystem.

FIG 2

March 2021

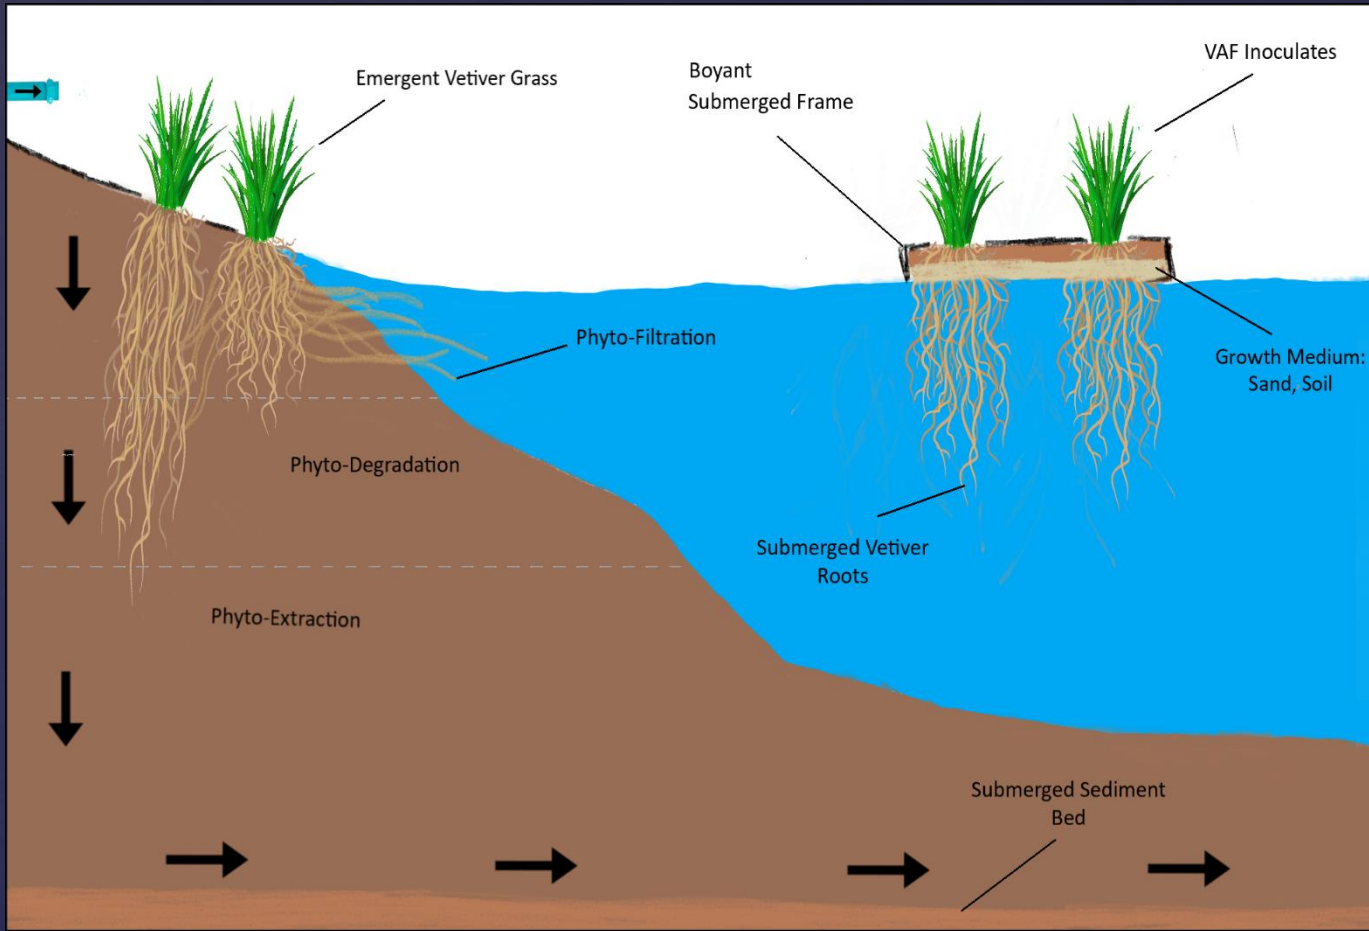

# IMPROVING MODERATELY HM CONTAMINATED WATERS USING NANO MYCORRHIZO PHYTOREMEDIATION STRATEGY

SYMBIOTIC OR FREE LIVING N-FIXING MICROBES (IN ROOT NODULES OR IN RHIZOSPHERE) SECRETING HM-AFFINITY TRANSPORTER NANO-MOLECULES

External Fungal Hyphae of AMF FUNGI SECRETING HM-AFFINITY TRANSPORTER NANOMATERIALS IMMOBILIZING OR TRANSLOCATING HMs INTO ROOT CELL

IDEAL PLANT (eg *Vetiver Zizinioides*) SECRETING PHYTOCHELATING NANO-MOLECULES TRANSLOCATING HMs IN ROOTS OR SHOOT

# Concluding Remarks

Please remember that Mycorrhizae are not a miracle.

It is only a helping hand. Although I showed lots of benefits.

Inoculum developed with certain fungi work very well under certain conditions with some crops , but not with others.

Inoculum must be developed with local isolates and existing conditions.

A Nano-Phytoremediation strategy to MYCORHIZOREMEDIATE HM contaminated WATERS depends on the:

- AM fungal isolate
- The Plant spp. , and
- Nutritional (including HMs) status of contaminated soils.

More data is needed before adopting this strategy for nano-phytoremediation



# Thank You for Your Kind Attention

Contact Email details:

Professor (Rtd.) Dr AG Khan  
lasara1937@gmail.com
